# Supplementary material for: Ethylene positively regulates cold tolerance in grapevine by modulating the expression of ETHYLENE RESPONSE FACTOR 057
Source: PubMed Central journal article supplement (PMC4819186; doi:10.1038/srep24066), 2016-04-04
Supplement: srep24066-s1.pdf [file srep24066-s1.pdf]

## Supplementary information

### **Ethylene positively regulates cold tolerance in grapevine by modulating the expression of ETHYLENE RESPONSE FACTOR 057**

Xiaoming Sun<sup>1,3,4</sup>, Tingting Zhao<sup>1,4</sup>, Shuheng Gan<sup>1</sup>, Xiaodie Ren<sup>1</sup>, Linchuan Fang<sup>1</sup>, Sospeter Karanja Karungo<sup>1,4</sup>, Yi Wang<sup>3</sup>, Liang Chen<sup>1</sup>, Shaohua Li<sup>3\*</sup> and Haiping Xin<sup>1,2\*</sup>

1. Key Laboratory of Plant Germplasm Enhancement and Specialty Agriculture, Wuhan Botanical Garden, Chinese Academy of Sciences, Wuhan 430074, P.R. China
2. Sino-Africa Joint Research Center, Chinese Academy of Sciences, Wuhan 430074 P.R. China
3. Beijing Key Laboratory of Grape Sciences and Enology, CAS Key Laboratory of Plant Resources, Institute of Botany, Chinese Academy of Sciences, Beijing 100093, P.R. China
4. University of Chinese Academy of Sciences, Beijing 100049, P.R. China

\*Correspondence author:

SL: [shhli@ibcas.ac.cn](mailto:shhli@ibcas.ac.cn)

HX: [xinhaiping215@hotmail.com](mailto:xinhaiping215@hotmail.com)

|          |                                                                                             |     |
|----------|---------------------------------------------------------------------------------------------|-----|
| VaERF057 | MCGGAIISDFIPRNRNRDPAPERWPDSEFFAKPDGCEYDLGRFSQKGLPNLKRSPILDDPEVKPAKRVKRNLYRGIQRFPWGKAAAEI    | 90  |
| VvERF057 | MCGGAIISDFIPRNRNRDPAPESWPDSEFFAKPDGCEYDLGRFSQKGLPNLKRSPILDDPEVKPAKRVKRNLYRGIQRFPWGKAAAEI    | 90  |
| VaERF057 | RDPSKGVVWLGTFNTAEEAARAYDREARKIRGKAKVNFNEDDDYTENHQNHRCLPTRWNSNPSICQPYTFNFSKSLGFADHLNQIGA     | 180 |
| VvERF057 | RDPSKGVVWLGTFNTAEEAARAYDREARKIRGKAKVNFNEDDDYTENHQNHRCALPTRWNSNPSICQPYTFNFSKSLGFADHLNQIGA    | 180 |
| VaERF057 | FPSNGFNTVGAMNANFVAVTTEVKYGSDESSEVYSSGLLNCNQKACVGVKQKQENQETVTEAEKEEMEVQKLSSEELMAYESLTKMFFYQI | 270 |
| VvERF057 | FPSNGFNTVGAMNANFVAVTTEVKYGSDESSEVYSSGLLNCNQKACVGVKQKQENQETVTEAEKEEMEVQKLSSEELMAYESLTKMFFYQI | 270 |
| VaERF057 | PYLDGNSAAVPNAAQENAGVCGGAMMEALWSFDEFVAVAPOPTSAA                                              | 315 |
| VvERF057 | PYLDGNSAAVPNAAQENAGVCGGAMMEALWSFDEFVAVAPOPTSAA                                              | 315 |

**Figure S1.** Protein sequence alignment between VaERF057 and VvERF057. The conserved AP2/ERF domains are marked below the corresponding sequences.

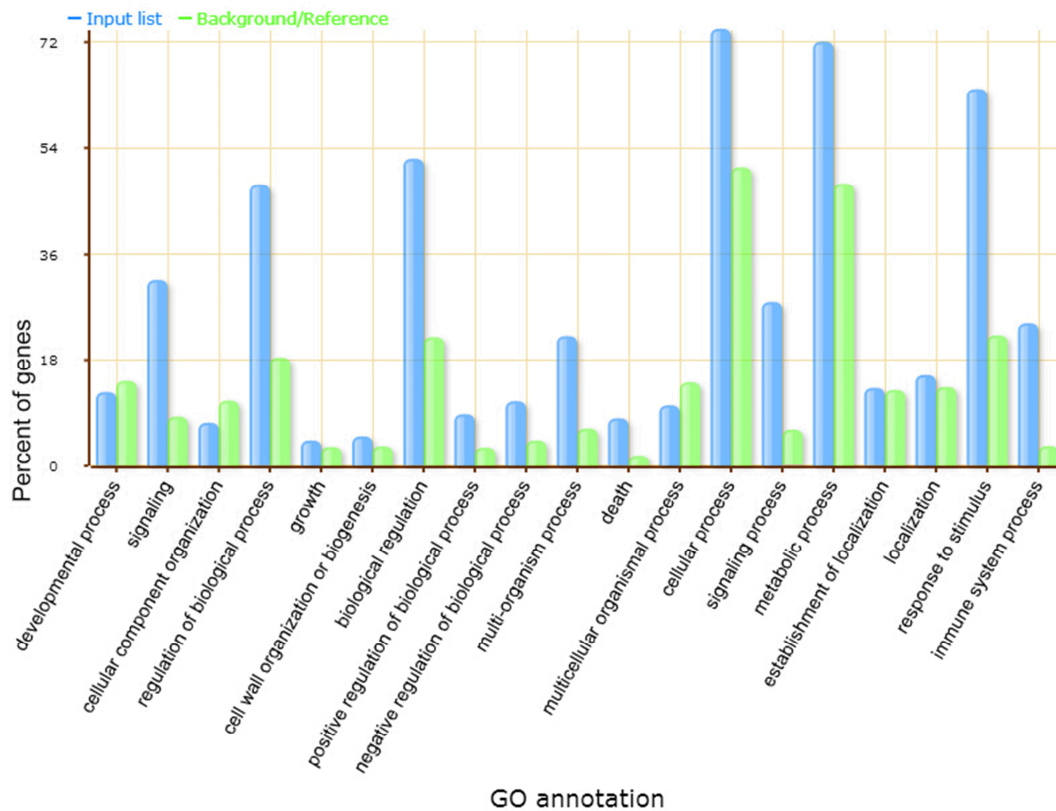

**Figure S2.** GO term enrichment analysis of significantly differentially expressed genes identified in the *VaERF057* overexpressing Arabidopsis. Blue and green bars indicate the enrichment of target genes in GO terms and the percentage of total annotated Arabidopsis genes mapping to GO terms, respectively.

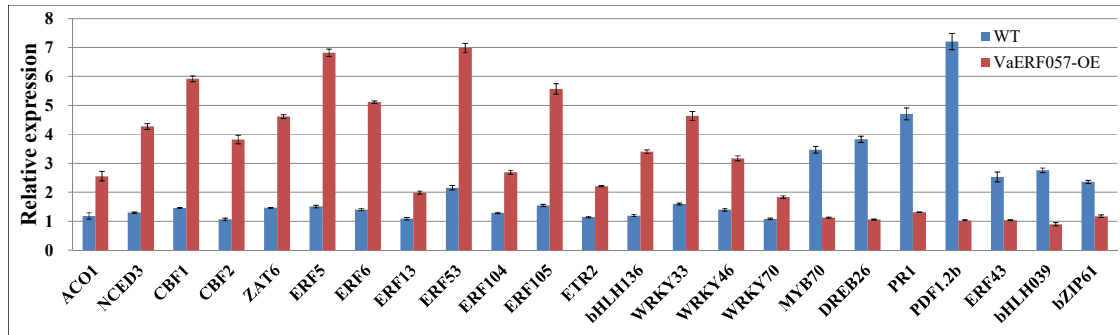

**Figure S3.** Expression patterns of 23 putative *VaERF057* downstream genes by qRT-PCR analysis. The *ACT2* (GenBank accession number: AT3G18780) and *UBQ10* (GenBank accession number: AT4G05320) were used as the internal controls. Each reaction was replicated three times for each biological sample, using a total of three biological replicates. The relative expression was normalized to that of the internal controls. Error bars represent the standard deviations of nine PCR replicates of three biological replicates.

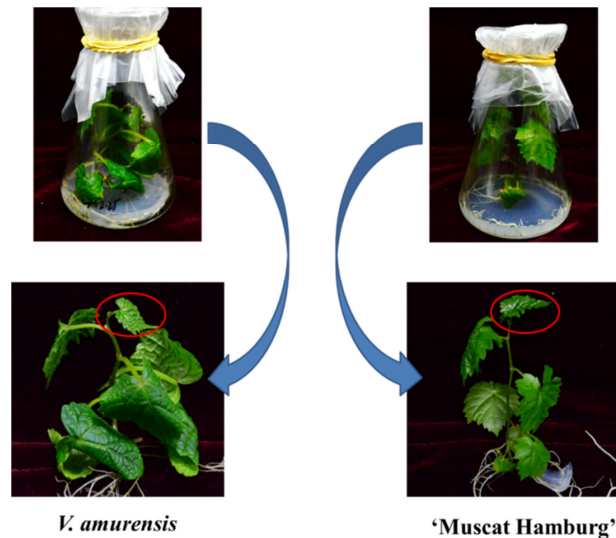

**Figure S4** Six-week-old plantlets of *V. amurensis* and 'Muscat Hamburg' used in this study. The shoot apex and one well developed leaf used for RNA extractions were marked with a red ellipse.

**Table S1 List of primer sequences used in this study**

| <b>Primer name</b>                            | <b>Primer sequence (5'-3')</b>                                 | <b>Description</b> |
|-----------------------------------------------|----------------------------------------------------------------|--------------------|
| <b>Primers used for ORF PCR</b>               |                                                                |                    |
| ERF057-ORF-F                                  | ATGTGTGGAGGTGCTATC                                             | Forward primer     |
| ERF057-ORF-R                                  | TTATAGAGCAGCTGAGGTG                                            | Reverse primer     |
| <b>Primers used for real time RT-PCR</b>      |                                                                |                    |
| ERF057-RT-F                                   | CTATCTCGACGGCAACTCAG                                           | Forward primer     |
| ERF057-RT-R                                   | GAGGAGCAAATGCAAATTCA                                           | Reverse primer     |
| VvActin-F                                     | CTTGCATCCCTCAGCACCTT                                           | Forward primer     |
| VvActin-R                                     | TCCTGTGGACAATGGATGGA                                           | Reverse primer     |
| VvMDH-F                                       | CCATGCATCATCACCCACAA                                           | Forward primer     |
| VvMDH-R                                       | GTCAACCATGCTACTGTCAAAAACC                                      | Reverse primer     |
| AtERF13-F                                     | TCCGTTCCCTCCCGTTACCT                                           | Forward primer     |
| AtERF13-R                                     | GCCTCCTCCTCACTCCTCTGT                                          | Reverse primer     |
| AtEFR5-F                                      | GGTTGAGAAAGTGTGAAGACGG                                         | Forward primer     |
| AtEFR5-R                                      | TGGATGAGGAGATAACGGCG                                           | Reverse primer     |
| AtEFR6-F                                      | GTGACGGTGGTTGAGAAAGTGC                                         | Forward primer     |
| AtEFR6-R                                      | CAAACGGTGGGTGTGGAGA                                            | Reverse primer     |
| AtERF105-F                                    | ACTCTAAGCCAACGCAAACCA                                          | Forward primer     |
| AtERF105-R                                    | GCCTAACCAGACACGAACACC                                          | Reverse primer     |
| AtZAT6-F                                      | GAACGGAGGCGGTGTGAG                                             | Forward primer     |
| AtZAT6-R                                      | GGTATCGGCGGTATGTTGAGG                                          | Reverse primer     |
| AtEFR53-F                                     | TAGGAGGGGTGAGTGAGGAGA                                          | Forward primer     |
| AtEFR53-R                                     | TGGTTAGAAATGGGAAAGTGGT                                         | Reverse primer     |
| AtWRKY33-F                                    | GCAGCTCGTGGTAGCGGTT                                            | Forward primer     |
| AtWRKY33-R                                    | TGGTGCTTGAGAAGAAGTAGTGTAGT                                     | Reverse primer     |
| AtWRKY46-F                                    | TTGAGAACGGTGTGTGGAAA                                           | Forward primer     |
| AtWRKY46-R                                    | ATAAAACCTCGCTGGTAATTGC                                         | Reverse primer     |
| AtACO1-F                                      | AAGAAAATGGGAAATGCGGA                                           | Forward primer     |
| AtACO1-R                                      | GGAAGTGAAGAAAGAAGAGTGAAGTAG                                    | Reverse primer     |
| AtNCED3-F                                     | AAAAGAGAGAGCGAGATTTACCAGT                                      | Forward primer     |
| AtNCED3-R                                     | GCACCCCAAAAGAAACAACAA                                          | Reverse primer     |
| AtbHLH136-F                                   | CTTTCTTCTTGGTCGTTTCCTTTC                                       | Forward primer     |
| AtbHLH136-R                                   | CTCTTTCTTACTTCTCTCACACTAGCTC                                   | Reverse primer     |
| AtERF104-F                                    | ATGTGGGAGCAGGAGATGGT                                           | Forward primer     |
| AtERF104-R                                    | AGAGTGACGCAAGTAAAACG                                           | Reverse primer     |
| AtETR2-F                                      | GGTGCAGTTGATTCATGGGA                                           | Forward primer     |
| AtETR2-R                                      | TGTGGGTGAGCGTGGTGG                                             | Reverse primer     |
| AtbHLH113-F                                   | AGGCTGCTCCTCCTGCTC                                             | Forward primer     |
| AtbHLH113-R                                   | CCATTCCTCCTCCTTCTC                                             | Reverse primer     |
| AtWRKY70-F                                    | CATCTCCTCCTCCTCATCCCT                                          | Forward primer     |
| AtWRKY70-R                                    | GGTCCCAATCTTTCCGACTATC                                         | Reverse primer     |
| AtbZIP61-F                                    | CATCAACGGCAATGTGGGT                                            | Forward primer     |
| AtbZIP61-R                                    | TGTCGTCGCTCGCTAAGGCTA                                          | Reverse primer     |
| AtERF43-F                                     | TGGGATTCTCTCTGTTTTGCT                                          | Forward primer     |
| AtERF43-R                                     | CACTTACATTTCCATCGTCTGTTTC                                      | Reverse primer     |
| AtbHLH39-F                                    | CGGAGGGAAATGAAATAGACAA                                         | Forward primer     |
| AtbHLH39-R                                    | AGACATGAACGGAGAGATGAGAAC                                       | Reverse primer     |
| AtMYB70-F                                     | TTAAACCGACGGCGAGAGC                                            | Forward primer     |
| AtMYB70-R                                     | GACCCAAGGCAAAGACAACC                                           | Reverse primer     |
| AtPR1-F                                       | TGCAGTGGGACGAGAGGG                                             | Forward primer     |
| AtPR1-R                                       | ATGTTACGCGGAGACG                                               | Reverse primer     |
| AtDREB26-F                                    | GTGAGGATGAGAAGTTGGGGA                                          | Forward primer     |
| AtDREB26-R                                    | TTGAGATTGGCTTGAGGGC                                            | Reverse primer     |
| AtPDF1.2b-F                                   | TATCTACGCTGCTCTTGTCTCTT                                        | Forward primer     |
| AtPDF1.2b-R                                   | GCTGTTCCGCAAACCTCCT                                            | Reverse primer     |
| AtACT2-F                                      | TTACCCGATGGGCAAGTCA                                            | Forward primer     |
| AtACT2-R                                      | AAACGAGGGCTGGAACAAGA                                           | Reverse primer     |
| AtUBQ10-F                                     | CACACTCCACTTGGTCTTGCGT                                         | Forward primer     |
| AtUBQ10-R                                     | TGGTCTTCCGGTGAGAGTCTTCA                                        | Reverse primer     |
| <b>Primers used in yeast one-hybrid assay</b> |                                                                |                    |
| GCC-F                                         | CCCAAGCTTTAAGAGCCGCCTAAGAGCCGCCTAAGAGCCGCCTAAGAGCCGCCCTCGAGCGG | Forward primer     |
| GCC-R                                         | CCGCTCGAGGGCGGCTCTTAGGCGGCTCTTAGGCGGCTCTTAGGCGGCTCTTAAAGCTTGGG | Reverse primer     |
| mGCC-F                                        | CCCAAGCTTTAAGATCCTCCTAAGATCCTCCTAAGATCCTCCTAAGATCCTCCTCGAGCGG  | Forward primer     |

|        |                                                                    |                |
|--------|--------------------------------------------------------------------|----------------|
| mGCC-R | CCGCTCGAGGGAGGATCTTAGGAGGATCTTAGGAGGATCTTAGGAGGATCTTAAAGCTTGGG     | Reverse primer |
| DRE-F  | CCCAAGCTTACTACCGACATTACTACCGACATTACTACCGACATTACTACCGACATCTCGAGCGG  | Forward primer |
| DRE-R  | CCGCTCGAGATGTCGGTAGTAATGTCGGTAGTAATGTCGGTAGTAATGTCGGTAGTAAAGCTTGGG | Reverse primer |
| mDRE-F | CCCAAGCTTACTATTTACATTACTATTTACATTACTATTTACATTACTATTTACATCTCGAGCGG  | Forward primer |
| mDRE-R | CCGCTCGAGATGTAAATAGTAATGTAAATAGTAATGTAAATAGTAATGTAAATAGTAAAGCTTGGG | Reverse primer |

**Table S2 Significantly differentially expressed genes in *VaERF057* overexpressing Arabidopsis**

| AGI locus                 | Symbol      | Locus               | WT value | VaERF73-OE value | log2(fold_change) | FDR    | Significant | Motif number (location) * |              |
|---------------------------|-------------|---------------------|----------|------------------|-------------------|--------|-------------|---------------------------|--------------|
|                           |             |                     |          |                  |                   |        |             | GCC-box                   | DRE          |
| <b>Up-regulated genes</b> |             |                     |          |                  |                   |        |             |                           |              |
| AT3G01345                 | -           | 3:129137-130749     | 0.2993   | 4.9036           | 4.0342            | 0.0056 | yes         |                           |              |
| AT5G39890                 | PCO2        | 5:15974392-15976270 | 0.3976   | 6.4679           | 4.0239            | 0.0056 | yes         |                           |              |
| AT4G39480                 | CYP96A9     | 4:18362257-18364209 | 0.3189   | 2.2593           | 2.8248            | 0.0244 | yes         |                           |              |
| AT5G54470                 | BBX29       | 5:22114303-22115472 | 1.2157   | 8.5292           | 2.8106            | 0.0056 | yes         |                           |              |
| AT1G05575                 | -           | 1:1661690-1662187   | 3.0158   | 16.5386          | 2.4552            | 0.0056 | yes         |                           |              |
| AT1G04180                 | YUC9        | 1:1104622-1105988   | 0.5023   | 2.6747           | 2.4127            | 0.0498 | yes         |                           |              |
| AT2G44840                 | ATERF13     | 2:18495340-18496272 | 0.7589   | 4.0186           | 2.4047            | 0.0360 | yes         |                           |              |
| AT5G47230                 | ERF5        | 5:19179938-19181129 | 3.7241   | 17.8588          | 2.2617            | 0.0056 | yes         |                           | 1 (837)      |
| AT4G25480                 | DREB1A/CBF3 | 4:13018213-13019121 | 2.8959   | 13.6147          | 2.2331            | 0.0056 | yes         |                           |              |
| AT3G49570                 | LSU3        | 3:18372532-18373024 | 3.0343   | 13.8132          | 2.1866            | 0.0056 | yes         |                           |              |
| AT2G16060                 | GLB1        | 2:6982530-6983631   | 3.6022   | 16.3152          | 2.1793            | 0.0056 | yes         |                           |              |
| AT2G15020                 | -           | 2:6491433-6493352   | 1.1767   | 4.7612           | 2.0166            | 0.0056 | yes         |                           | 1 (196)      |
| AT4G17490                 | ATERF6      | 4:9752823-9753867   | 9.4843   | 37.4082          | 1.9798            | 0.0056 | yes         |                           | 1 (452)      |
| AT4G25490                 | CBF1        | 4:13021779-13022725 | 1.0776   | 4.1205           | 1.9349            | 0.0273 | yes         |                           |              |
| AT3G29000                 | CML30       | 3:11005778-11006414 | 2.9553   | 11.1131          | 1.9109            | 0.0056 | yes         |                           | 1 (781)      |
| AT1G44414                 | -           | 1:16847780-16848086 | 0.0000   | 2.6314           | 1.8605            | 0.0056 | yes         |                           |              |
| AT5G51190                 | ERF105      | 5:20800583-20801416 | 7.5954   | 27.4175          | 1.8519            | 0.0056 | yes         |                           | 1 (90)       |
| AT4G28720                 | YUC8        | 4:14192582-14194256 | 0.5932   | 2.0688           | 1.8023            | 0.0273 | yes         |                           | 1 (675)      |
| AT1G10560                 | PUB18       | 1:3484579-3486965   | 0.8326   | 2.8749           | 1.7878            | 0.0056 | yes         |                           | 1 (743)      |
| AT5G27420                 | CNI1        | 5:9684071-9685561   | 3.8753   | 13.3336          | 1.7827            | 0.0056 | yes         |                           |              |
| AT2G24600                 | -           | 2:10452115-10454524 | 2.0584   | 6.9674           | 1.7591            | 0.0102 | yes         |                           |              |
| AT5G04340                 | AtZAT6      | 5:1216130-1217106   | 6.9904   | 23.3493          | 1.7399            | 0.0056 | yes         | 1 (704)                   | 2 (590, 752) |
| AT4G16780                 | ATHB-2      | 4:9449113-9450743   | 15.4712  | 51.4517          | 1.7336            | 0.0056 | yes         |                           |              |
| AT2G20880                 | ERF053      | 2:8985972-8987263   | 1.3663   | 4.5384           | 1.7319            | 0.0056 | yes         |                           | 2 (597, 794) |
| AT2G38470                 | WRKY33      | 2:16108360-16111797 | 13.0216  | 42.6359          | 1.7112            | 0.0056 | yes         | 1 (746)                   |              |
| ATCG00920                 | RRN16S.1    | Pt:101011-102502    | 1.1336   | 3.7099           | 1.7105            | 0.0056 | yes         |                           |              |
| AT2G46400                 | WRKY46      | 2:19043413-19044826 | 1.0893   | 3.5118           | 1.6889            | 0.0300 | yes         |                           | 1 (507)      |
| AT1G35210                 | -           | 1:12896651-12897402 | 2.0675   | 6.6205           | 1.6790            | 0.0056 | yes         |                           | 1 (847)      |
| AT1G76650                 | CML38       | 1:28766749-28768138 | 8.7692   | 27.9622          | 1.6730            | 0.0056 | yes         |                           |              |
| AT5G62020                 | AT-HSFB2A   | 5:24916088-24917643 | 1.7653   | 5.5534           | 1.6534            | 0.0056 | yes         |                           | 2 (168, 649) |

|           |              |                     |          |          |        |        |     |         |                        |
|-----------|--------------|---------------------|----------|----------|--------|--------|-----|---------|------------------------|
| AT1G72940 | -            | 1:27442237-27443856 | 5.7711   | 17.8957  | 1.6327 | 0.0056 | yes | 1 (793) | 1 (622)                |
| AT2G40140 | CZF1         | 2:16772072-16774657 | 10.3269  | 31.3774  | 1.6033 | 0.0056 | yes |         |                        |
| AT1G72920 | -            | 1:27437927-27439091 | 6.9128   | 20.7881  | 1.5884 | 0.0056 | yes | 1 (788) | 1 (618)                |
| AT5G54490 | PBP1         | 5:22121403-22121931 | 5.8383   | 17.5502  | 1.5879 | 0.0056 | yes |         | 1 (674)                |
| AT1G02450 | NIMIN1       | 1:497975-498516     | 2.7897   | 8.2494   | 1.5642 | 0.0498 | yes |         | 1 (294)                |
| AT3G02550 | LBD41        | 3:536504-537998     | 7.5611   | 22.3408  | 1.5630 | 0.0056 | yes |         | 1 (457)                |
| AT1G27730 | STZ          | 1:9648140-9649073   | 16.3225  | 48.1982  | 1.5621 | 0.0056 | yes | 1 (669) | 1 (717)                |
| AT2G28400 | -            | 2:12148303-12149052 | 4.3087   | 12.6876  | 1.5581 | 0.0056 | yes |         |                        |
| AT2G19590 | ACO1         | 2:8475965-8477502   | 1.4316   | 4.1553   | 1.5374 | 0.0142 | yes |         | 1 (146)                |
| ATCG00950 | RRN23S.1     | Pt:104690-107500    | 1.3074   | 3.5656   | 1.4475 | 0.0056 | yes | 1 (239) | 4 (236, 377, 452, 519) |
| AT1G17147 | -            | 1:5863430-5864009   | 4.1542   | 11.1151  | 1.4199 | 0.0332 | yes |         |                        |
| AT5G41750 | -            | 5:16693908-16698943 | 1.0726   | 2.8620   | 1.4159 | 0.0056 | yes | 1 (290) |                        |
| AT3G12580 | HSP70        | 3:3991260-3993792   | 2.2349   | 5.9529   | 1.4134 | 0.0056 | yes |         | 1 (949)                |
| AT2G39650 | -            | 2:16527791-16529407 | 2.4532   | 6.4801   | 1.4013 | 0.0056 | yes |         | 1 (49)                 |
| AT1G72910 | -            | 1:27435613-27437144 | 17.0062  | 43.5665  | 1.3572 | 0.0056 | yes | 1 (810) |                        |
| AT3G14440 | NCED3        | 3:4831287-4833599   | 2.4142   | 6.1342   | 1.3453 | 0.0056 | yes |         | 1 (58)                 |
| AT1G66090 | -            | 1:24602145-24604763 | 4.6137   | 11.4265  | 1.3084 | 0.0056 | yes |         |                        |
| AT4G02410 | LECRK43      | 4:1059888-1062153   | 4.2324   | 10.2991  | 1.2830 | 0.0056 | yes |         |                        |
| AT5G54610 | ANK          | 5:22184778-22186525 | 7.6086   | 18.4732  | 1.2797 | 0.0056 | yes |         |                        |
| AT3G47420 | ATPS3        | 3:17472341-17475258 | 2.0491   | 4.9498   | 1.2724 | 0.0056 | yes |         |                        |
| AT3G46600 | -            | 3:17157923-17159965 | 20.6248  | 49.7930  | 1.2716 | 0.0056 | yes | 1 (886) |                        |
| AT1G73870 | COL7         | 1:27779165-27780676 | 5.5078   | 13.2585  | 1.2674 | 0.0056 | yes |         |                        |
| AT1G09350 | AtGolS3      | 1:3019818-3021441   | 1.6180   | 3.8571   | 1.2533 | 0.0391 | yes |         | 4 (181, 209, 605, 616) |
| AT3G56710 | SIB1         | 3:21006749-21007565 | 13.5466  | 32.1341  | 1.2462 | 0.0056 | yes | 1 (721) | 3 (135, 182, 498)      |
| ATCG00340 | PSAB         | Pt:37374-39579      | 2.5676   | 6.0654   | 1.2402 | 0.0056 | yes |         |                        |
| ATCG01210 | RRN16S.2     | Pt:136146-137637    | 258.4100 | 606.9130 | 1.2318 | 0.0056 | yes |         |                        |
| AT5G57220 | CYP81F2      | 5:23187839-23189857 | 1.7360   | 4.0732   | 1.2304 | 0.0102 | yes |         | 2 (260, 300)           |
| AT5G15120 | -            | 5:4898736-4900581   | 2.0025   | 4.6861   | 1.2266 | 0.0441 | yes |         |                        |
| AT5G39860 | PRE1/bHLH136 | 5:15957416-15958455 | 11.8565  | 27.7209  | 1.2253 | 0.0056 | yes |         |                        |
| AT3G55980 | SZF1         | 3:20776294-20778842 | 22.1026  | 51.2023  | 1.2120 | 0.0056 | yes |         |                        |
| AT1G04770 | -            | 1:1336370-1337849   | 9.6979   | 22.1318  | 1.1904 | 0.0056 | yes |         | 1 (821)                |
| AT5G60900 | RLK1         | 5:24498466-24501494 | 1.4075   | 3.2050   | 1.1872 | 0.0056 | yes |         |                        |
| AT4G25470 | CBF2         | 4:13015276-13016220 | 2.7421   | 6.2041   | 1.1779 | 0.0418 | yes |         |                        |
| AT3G61890 | ATHB-12      | 3:22914153-22915325 | 2.9438   | 6.6568   | 1.1772 | 0.0214 | yes |         | 1 (142)                |
| AT1G16400 | CYP79F2      | 1:5605158-5607473   | 1.9577   | 4.3822   | 1.1625 | 0.0056 | yes | 1 (125) | 2 (71, 159)            |
| AT4G24570 | DIC2         | 4:12686458-12687650 | 20.1988  | 44.9687  | 1.1547 | 0.0056 | yes |         |                        |

|           |          |                     |          |          |        |        |     |         |                        |
|-----------|----------|---------------------|----------|----------|--------|--------|-----|---------|------------------------|
| AT2G26530 | AR781    | 2:11282774-11284229 | 19.4446  | 43.0977  | 1.1482 | 0.0056 | yes | 1 (513) | 1 (398)                |
| AT5G61600 | ERF104   | 5:24766385-24767430 | 32.6714  | 71.8693  | 1.1374 | 0.0056 | yes |         |                        |
| ATCG01180 | RRN23S.2 | Pt:131148-133958    | 258.2490 | 567.2080 | 1.1351 | 0.0056 | yes | 1 (239) | 4 (236, 377, 452, 519) |
| AT3G23150 | ETR2     | 3:8254662-8257735   | 2.2312   | 4.8933   | 1.1330 | 0.0056 | yes |         | 1 (411)                |
| ATCG00490 | RBCL     | Pt:54957-56397      | 17.8428  | 38.9271  | 1.1254 | 0.0056 | yes |         |                        |
| AT3G48650 | -        | 3:18024662-18026149 | 2.2991   | 4.9340   | 1.1017 | 0.0142 | yes |         |                        |
| AT1G01260 | BHLH13   | 1:108945-111609     | 2.1842   | 4.6663   | 1.0952 | 0.0360 | yes |         |                        |
| AT2G33380 | RD20     | 2:14144830-14146471 | 7.1947   | 15.1857  | 1.0777 | 0.0056 | yes |         | 2 (458, 565)           |
| AT3G15760 | -        | 3:5337546-5338467   | 7.0521   | 14.8535  | 1.0747 | 0.0056 | yes |         | 1 (735)                |
| AT2G36800 | DOGT1    | 2:15423379-15425016 | 3.5112   | 7.3386   | 1.0635 | 0.0056 | yes |         | 1 (232)                |
| ATCG00020 | PSBA     | Pt:382-1444         | 35.0099  | 72.9502  | 1.0592 | 0.0056 | yes |         | 1 (694)                |
| AT3G56080 | -        | 3:20810308-20813036 | 2.8280   | 5.8835   | 1.0569 | 0.0056 | yes |         |                        |
| AT5G12050 | -        | 5:3890103-3891513   | 15.5894  | 32.0352  | 1.0391 | 0.0056 | yes |         |                        |
| AT5G20830 | SUS1     | 5:7050225-7055195   | 7.3059   | 15.0020  | 1.0380 | 0.0056 | yes |         |                        |
| AT5G64660 | ATCMPG2  | 5:25841912-25843452 | 2.7997   | 5.7416   | 1.0362 | 0.0214 | yes |         |                        |
| AT1G11050 | -        | 1:3681887-3684169   | 4.3127   | 8.8368   | 1.0349 | 0.0056 | yes | 1 (914) |                        |
| AT1G74930 | ORA47    | 1:28144131-28145049 | 4.4509   | 9.1053   | 1.0326 | 0.0391 | yes |         |                        |
| AT3G56400 | WRKY70   | 3:20908927-20910481 | 69.3531  | 141.7730 | 1.0316 | 0.0056 | yes |         |                        |
| AT3G27220 | -        | 3:10051611-10053678 | 3.8009   | 7.6766   | 1.0141 | 0.0056 | yes |         | 2 (407, 744)           |
| AT1G13080 | CYP71B2  | 1:4459165-4460940   | 4.3907   | 8.8480   | 1.0109 | 0.0056 | yes |         |                        |
| AT4G32280 | IAA29    | 4:15583386-15584769 | 6.6877   | 13.4715  | 1.0103 | 0.0056 | yes |         | 2 (355, 375)           |
| AT1G32920 | -        | 1:11928806-11929302 | 71.1725  | 143.0390 | 1.0070 | 0.0056 | yes |         |                        |
| ATMG00020 | RRN26    | Mt:8847-11415       | 7.9198   | 15.8437  | 1.0004 | 0.0056 | yes |         |                        |

**Down-regulated genes**

|           |                   |                     |         |         |         |        |     |              |              |
|-----------|-------------------|---------------------|---------|---------|---------|--------|-----|--------------|--------------|
| AT5G65080 | MAF5              | 5:25997503-26002465 | 11.6151 | 0.8203  | -3.8237 | 0.0056 | yes | 1 (670)      |              |
| AT1G35140 | PHI-1             | 1:12851996-12853128 | 39.8052 | 3.3770  | -3.5591 | 0.0056 | yes |              |              |
| AT2G26020 | PDF1.2b           | 2:11089249-11089597 | 35.7479 | 3.6227  | -3.3027 | 0.0214 | yes | 1 (731)      |              |
| AT2G39030 | AT2G39030/T7F6.20 | 2:16298226-16299202 | 4.7820  | 0.5172  | -3.2087 | 0.0244 | yes |              | 2 (76, 270)  |
| AT1G50040 | -                 | 1:18542129-18543948 | 16.4840 | 2.3485  | -2.8112 | 0.0056 | yes |              |              |
| AT4G16563 | -                 | 4:9329656-9331523   | 22.4411 | 4.0243  | -2.4793 | 0.0056 | yes |              | 1 (198)      |
| AT3G19680 | -                 | 3:6840280-6842856   | 65.7071 | 12.6862 | -2.3728 | 0.0056 | yes |              | 2 (249, 295) |
| AT4G08950 | EXO               | 4:5740296-5741524   | 89.2644 | 19.8846 | -2.1664 | 0.0056 | yes |              | 1 (663)      |
| AT5G61160 | AACT1             | 5:24608723-24610304 | 6.5000  | 1.5102  | -2.1057 | 0.0056 | yes | 2 (861, 869) | 1 (416)      |
| AT3G49620 | DIN11             | 3:18393746-18396816 | 6.4623  | 1.7215  | -1.9084 | 0.0056 | yes | 1 (497)      |              |
| AT2G04033 | -                 | 2:12931111-1293488  | 2.7506  | 0.0000  | -1.9071 | 0.0214 | yes |              |              |
| AT1G21910 | DREB26            | 1:7696535-7697699   | 14.8954 | 4.0686  | -1.8723 | 0.0056 | yes |              |              |



|           |         |                     |          |         |         |        |     |         |                   |
|-----------|---------|---------------------|----------|---------|---------|--------|-----|---------|-------------------|
| AT2G14610 | PR1     | 2:6241703-6242463   | 10.8443  | 3.2342  | -1.7455 | 0.0056 | yes | 1 (367) |                   |
| AT3G47340 | ASN1    | 3:17437883-17441243 | 12.1909  | 3.7471  | -1.7020 | 0.0056 | yes |         |                   |
| AT5G25240 | -       | 5:8746604-8747197   | 28.5624  | 8.8047  | -1.6978 | 0.0056 | yes |         |                   |
| AT5G24030 | SLAH3   | 5:8118316-8122784   | 13.6103  | 4.4664  | -1.6075 | 0.0056 | yes |         |                   |
| AT2G23290 | AtMYB70 | 2:9904786-9905920   | 16.0666  | 5.3209  | -1.5943 | 0.0056 | yes |         |                   |
| AT3G56980 | BHLH039 | 3:21086545-21087494 | 4.6691   | 1.5478  | -1.5930 | 0.0418 | yes | 1 (78)  | 1 (366)           |
| AT5G62920 | ARR6    | 5:25252385-25254212 | 19.3112  | 6.4555  | -1.5808 | 0.0056 | yes | 1 (173) | 2 (218, 708)      |
| AT4G14130 | XTR7    | 4:8137050-8138281   | 6.7449   | 2.3381  | -1.5285 | 0.0102 | yes |         |                   |
| AT2G17230 | EXL5    | 2:7494535-7496016   | 78.8487  | 28.1011 | -1.4885 | 0.0056 | yes |         | 1 (509)           |
| AT2G23130 | AGP17   | 2:9844298-9845385   | 79.3155  | 28.5504 | -1.4741 | 0.0056 | yes |         |                   |
| AT5G57550 | XTR3    | 5:23304887-23306421 | 3.9006   | 1.4128  | -1.4652 | 0.0471 | yes |         |                   |
| AT5G35935 | -       | 5:14083387-14089891 | 1.4440   | 0.5265  | -1.4556 | 0.0056 | yes |         |                   |
| AT3G45970 | ATEXLA1 | 3:16896165-16898013 | 88.4778  | 32.6542 | -1.4381 | 0.0180 | yes |         | 1 (740)           |
| AT4G16260 | -       | 4:9200009-9201552   | 10.6748  | 3.9842  | -1.4218 | 0.0056 | yes | 1 (289) | 1 (910)           |
| AT1G26260 | CIB5    | 1:9086852-9089378   | 3.1547   | 1.1853  | -1.4122 | 0.0441 | yes |         |                   |
| AT4G13340 | LRX3    | 4:7758609-7761057   | 67.8752  | 26.6012 | -1.3514 | 0.0056 | yes |         |                   |
| AT1G76930 | ATEXT4  | 1:28895300-28896883 | 16.2973  | 6.4686  | -1.3331 | 0.0056 | yes | 1 (131) |                   |
| AT5G57560 | TCH4    | 5:23307129-23308282 | 154.0040 | 61.3058 | -1.3289 | 0.0056 | yes |         | 1 (670)           |
| AT4G25810 | XTR6    | 4:13128642-13129884 | 5.7676   | 2.2960  | -1.3288 | 0.0244 | yes |         |                   |
| AT2G47440 | -       | 2:19469718-19471886 | 41.2605  | 16.7755 | -1.2984 | 0.0056 | yes |         |                   |
| AT2G19800 | MIOX2   | 2:8530895-8533508   | 5.4694   | 2.2504  | -1.2812 | 0.0102 | yes |         |                   |
| AT1G76090 | SMT3    | 1:28550408-28551781 | 65.4704  | 27.8547 | -1.2329 | 0.0056 | yes |         |                   |
| AT2G30930 | -       | 2:13162368-13163398 | 97.4122  | 41.6641 | -1.2253 | 0.0056 | yes |         |                   |
| AT2G19620 | NDL3    | 2:8483939-8488720   | 14.4735  | 6.2891  | -1.2025 | 0.0180 | yes |         | 1 (788)           |
| AT4G32800 | ERF043  | 4:15819523-15820871 | 10.4269  | 4.6531  | -1.1640 | 0.0056 | yes |         | 1 (565)           |
| AT1G11260 | STP1    | 1:3777327-3780337   | 194.8860 | 88.7315 | -1.1351 | 0.0056 | yes |         |                   |
| AT5G49360 | BXL1    | 5:20011878-20016742 | 111.3340 | 50.6932 | -1.1350 | 0.0056 | yes | 1 (200) |                   |
| AT1G10020 | -       | 1:3269603-3271987   | 27.5670  | 12.6036 | -1.1291 | 0.0056 | yes |         | 1 (384)           |
| AT1G23030 | PUB11   | 1:8156645-8159077   | 19.0853  | 8.7952  | -1.1177 | 0.0056 | yes |         | 3 (211, 548, 639) |
| AT1G03300 | ATDUF1  | 1:811032-813086     | 4.0065   | 1.8800  | -1.0916 | 0.0273 | yes |         |                   |
| AT5G05440 | PYL5    | 5:1609249-1610446   | 15.2472  | 7.3022  | -1.0622 | 0.0056 | yes |         | 1 (243)           |
| AT4G22513 | -       | 4:11854808-11857313 | 40.1332  | 19.2208 | -1.0621 | 0.0056 | yes |         |                   |
| AT5G26910 | -       | 5:9465928-9470403   | 7.6523   | 3.6924  | -1.0514 | 0.0056 | yes |         |                   |
| AT3G54810 | BME3-ZF | 3:20296231-20298691 | 35.6879  | 17.2328 | -1.0503 | 0.0056 | yes |         |                   |
| AT5G51550 | EXL3    | 5:20939493-20940895 | 196.4930 | 95.2736 | -1.0443 | 0.0056 | yes |         |                   |
| AT4G22880 | LDOX    | 4:12004767-12006209 | 6.5423   | 3.2083  | -1.0280 | 0.0142 | yes |         |                   |

|           |          |                     |         |         |         |        |     |  |  |
|-----------|----------|---------------------|---------|---------|---------|--------|-----|--|--|
| AT4G28900 | -        | 4:14259140-14263704 | 2.3376  | 1.1508  | -1.0225 | 0.0102 | yes |  |  |
| AT3G05727 | -        | 3:1693551-1694138   | 45.8587 | 22.7089 | -1.0139 | 0.0056 | yes |  |  |
| AT3G58120 | ATBZIP61 | 3:21520973-21523327 | 60.3416 | 29.9590 | -1.0102 | 0.0056 | yes |  |  |

\* Numbers and location of GCC-box or DRE in the 1 kb promoter of each gene.
